# Supplementary material for: Inhibition of PRMT5 triggers synthetic lethality in ARID1A-deficient endometrial cancer cells by promoting aberrant R-loop accumulation
Source: Research Square preprint supplement (doi:10.21203/rs.3.rs-7702632/v1), 2025-10-20

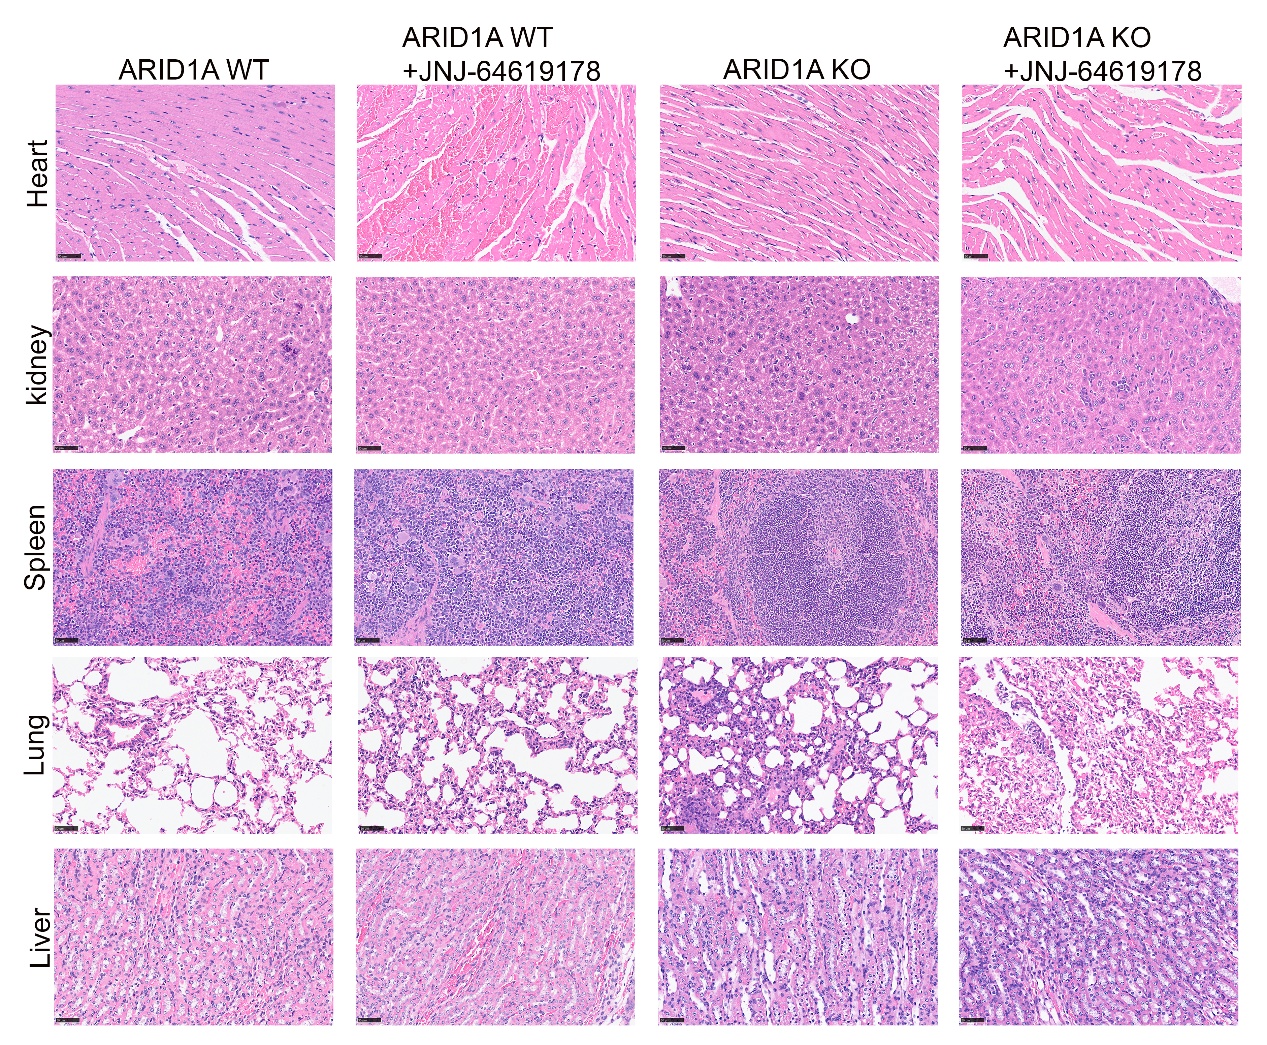


Figure S1: H&E staining of the heart, liver, spleen, lung, and kidney obtained from nude mice. Scale bar = 50 μm

Gels and blots images


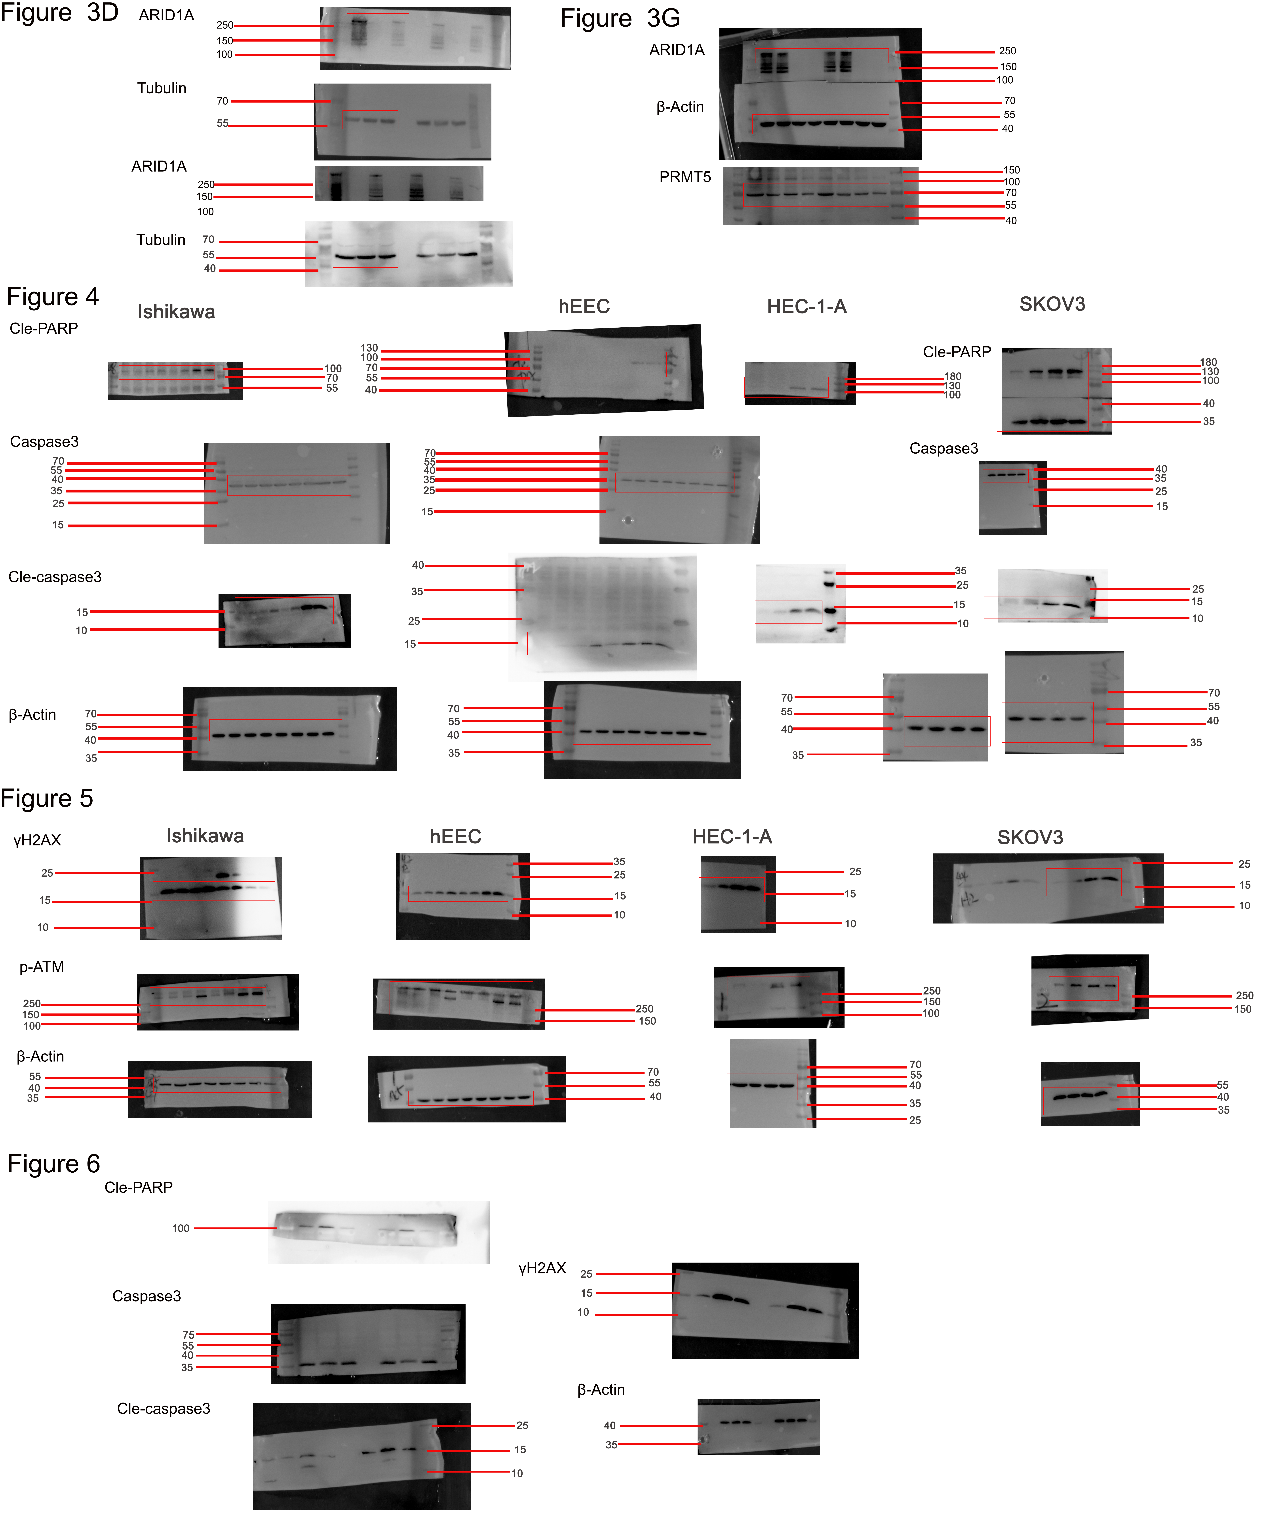


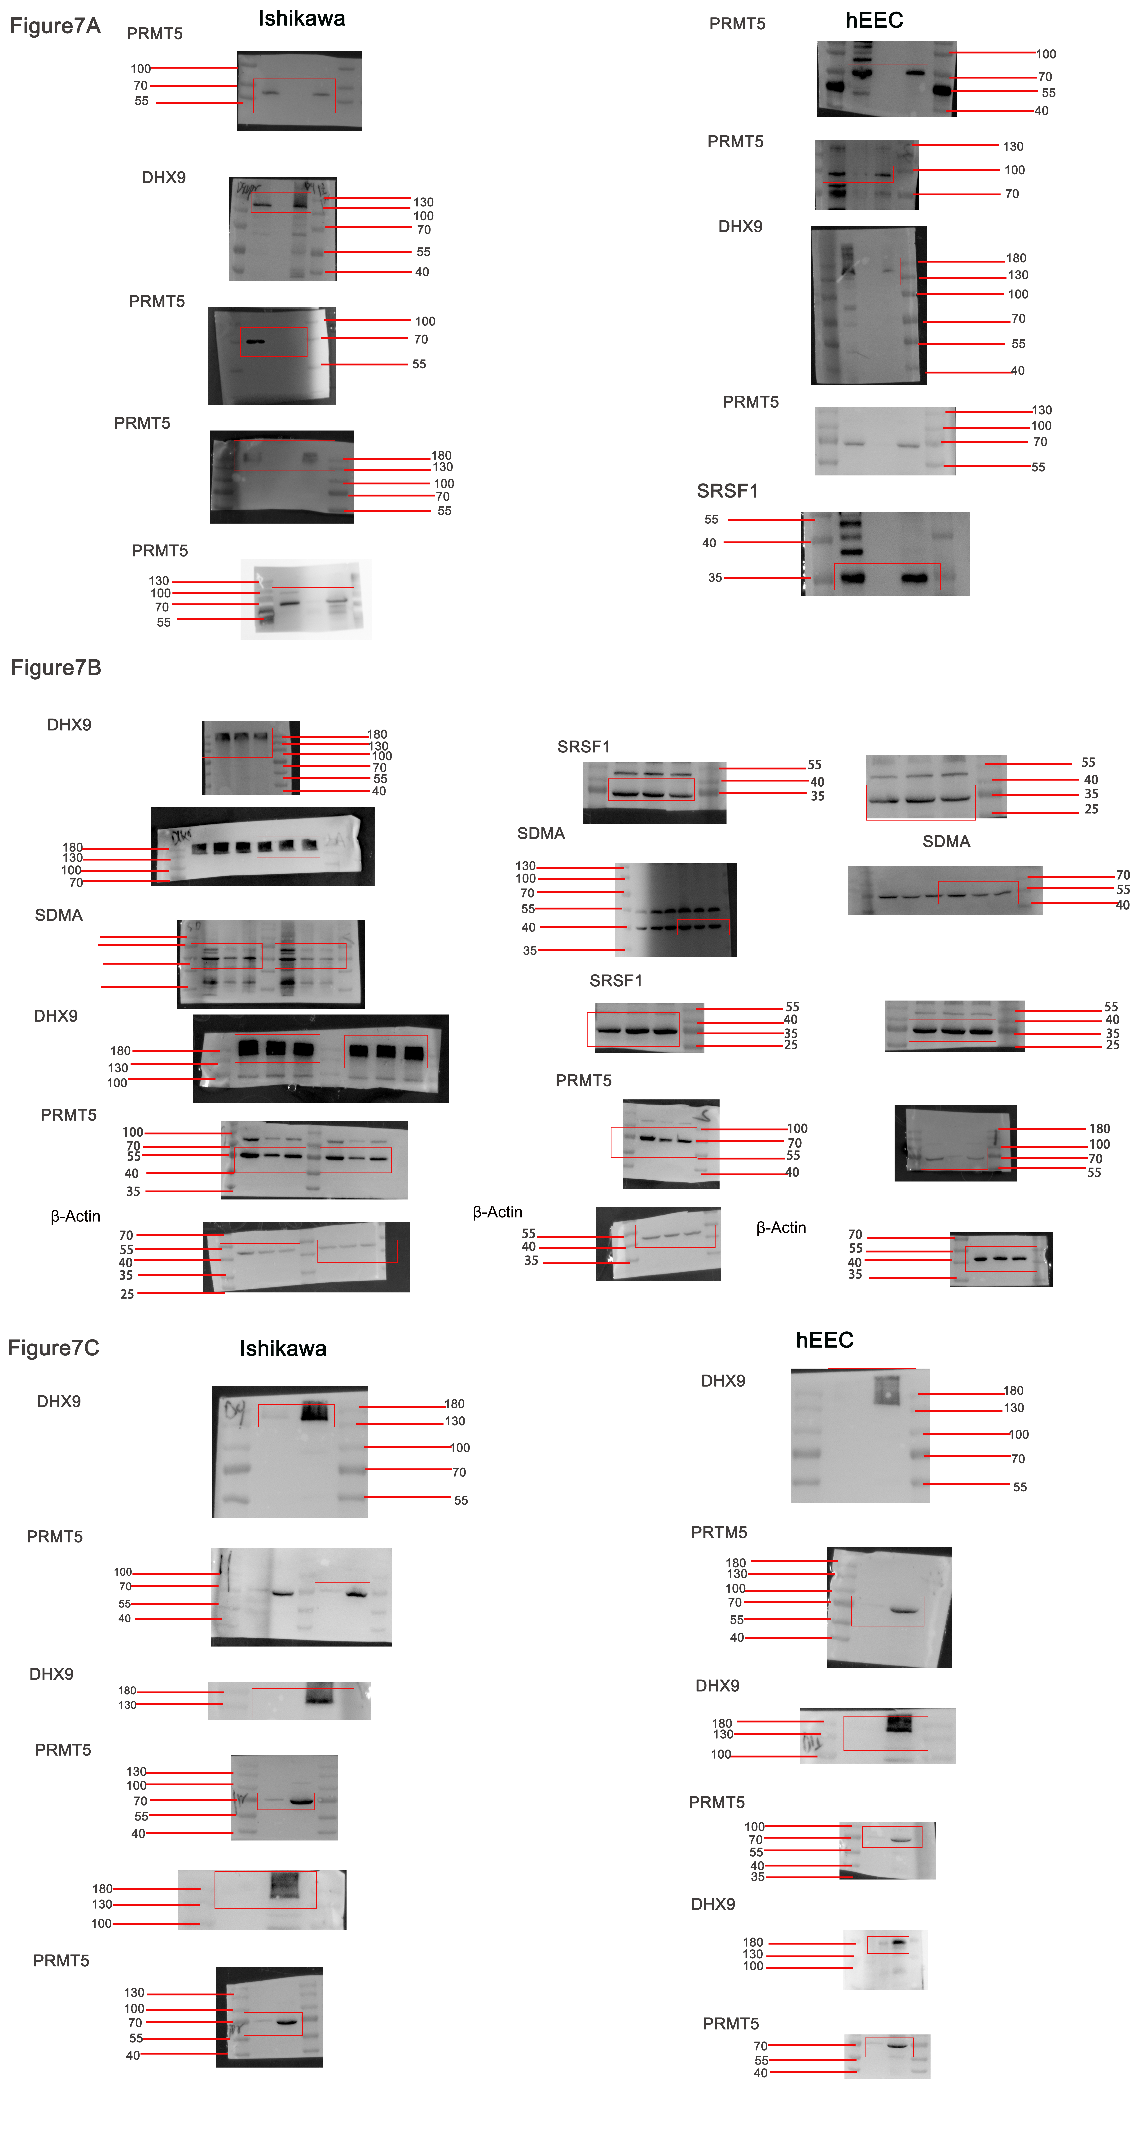


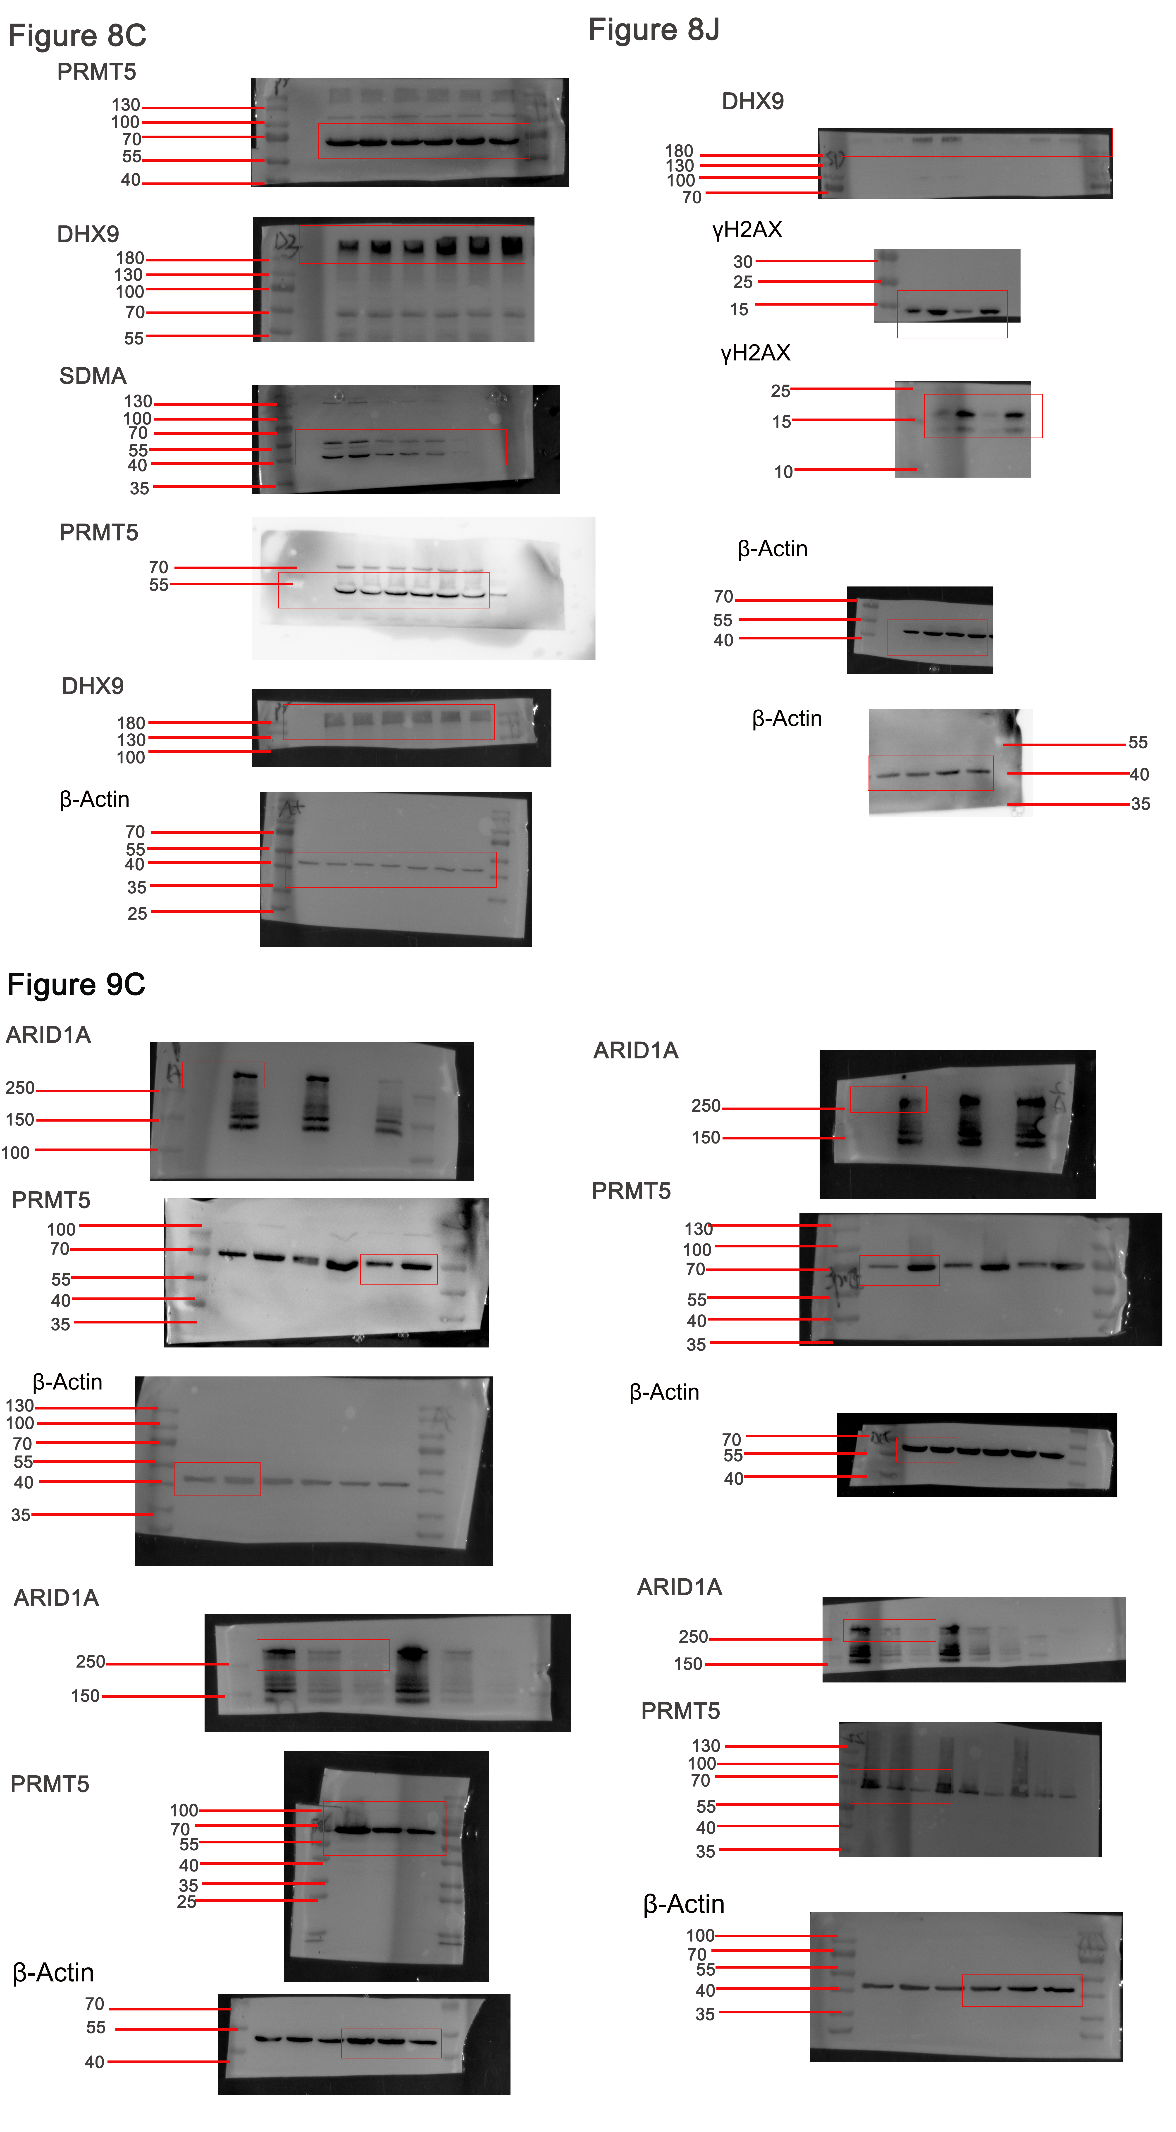

Supplement: Supplementary file 1 [file ccdbbf82f90a0e5c06edc91d.docx]
